# Supplementary material for: Cardiovascular Events After Bariatric Surgery in Obese Subjects With Type 2 Diabetes
Source: PubMed Central journal article supplement — Diabetes Care. 2012 Nov 14;35(12):2613–7. doi: 10.2337/dc12-0193 (PMC3507566; doi:10.2337/dc12-0193), 2012-11-14
Supplement: supp_dc12-0193v120193_DC120193SupplementaryData.pdf [file supp_dc12-0193v120193_DC120193SupplementaryData.pdf]

SUPPLEMENTARY DATA

**Supplementary Table 1.** Risk factor-treatment interaction analyses for myocardial infarction.

| Variable<br>Sub-grouping at baseline<br>(N Surgery/N Control) | Relative treatment effects |                    |                   |                             | NNT* |
|---------------------------------------------------------------|----------------------------|--------------------|-------------------|-----------------------------|------|
|                                                               | HR                         | 95% C.I.<br>for HR | P value<br>for HR | P value<br>for interaction† |      |
| <b>Total</b>                                                  | 0.59                       | 0.38-0.92          | 0.018             |                             | 16   |
| <b>Gender</b>                                                 |                            |                    |                   | 0.10                        |      |
| Men (N 142/104)                                               | 0.42                       | 0.23-0.76          | 0.004             |                             | 7    |
| Women (N 203/158)                                             | 0.84                       | 0.43-1.63          | 0.60              |                             | 111  |
| <b>Previous MI, No/Yes</b>                                    |                            |                    |                   | 0.68                        |      |
| No (N 327/251)                                                | 0.61                       | 0.38-0.98          | 0.041             |                             | 21   |
| Yes (N 18/11)                                                 | 0.53                       | 0.17-1.69          | 0.28              |                             | 2    |
| <b>Age, years</b>                                             |                            |                    |                   | 0.31                        |      |
| ≤49.8 (N 185/119)                                             | 0.76                       | 0.37-1.55          | 0.44              |                             | 143  |
| >49.8 (N 160/143)                                             | 0.54                       | 0.31-0.95          | 0.032             |                             | 10   |
| <b>BMI, kg/m<sup>2</sup></b>                                  |                            |                    |                   | 0.12                        |      |
| ≤40.6 (N 151/153)                                             | 0.43                       | 0.22-0.84          | 0.01              |                             | 9    |
| >40.6 (N 194/109)                                             | 0.78                       | 0.42-1.47          | 0.44              |                             | 250  |
| <b>Weight, kg</b>                                             |                            |                    |                   | 0.90                        |      |
| ≤118.4 (N 147/157)                                            | 0.52                       | 0.26-1.01          | 0.06              |                             | 14   |
| >118.4 (N 198/105)                                            | 0.62                       | 0.34-1.13          | 0.12              |                             | 16   |
| <b>Waist, cm</b>                                              |                            |                    |                   | 0.88                        |      |
| ≤120 (N 150/153)                                              | 0.51                       | 0.26-1.01          | 0.05              |                             | 13   |
| >120 (N 193/109)                                              | 0.63                       | 0.35-1.14          | 0.13              |                             | 16   |
| <b>Smoking, No/Yes</b>                                        |                            |                    |                   | 0.27                        |      |
| No (N 259/203)                                                | 0.66                       | 0.38-1.13          | 0.13              |                             | 32   |
| Yes (N 85/54)                                                 | 0.44                       | 0.21-0.94          | 0.030             |                             | 5    |
| <b>Insulin, mU/L</b>                                          |                            |                    |                   | 0.54                        |      |
| ≤23 (N 154/147)                                               | 0.77                       | 0.40-1.47          | 0.42              |                             | 19   |
| >23 (N 107/193)                                               | 0.43                       | 0.23-0.80          | 0.007             |                             | 13   |
| <b>Total cholesterol, mg/dL</b>                               |                            |                    |                   | 0.02                        |      |
| ≤224 (N 173/133)                                              | 1.26                       | 0.56-2.26          | 0.58              |                             | -    |
| >224 (N 171/129)                                              | 0.39                       | 0.23-0.68          | 0.001             |                             | 6    |
| <b>Triglycerides, mg/dL</b>                                   |                            |                    |                   | 0.02                        |      |
| ≤203 (N 169/137)                                              | 1.03                       | 0.49-2.17          | 0.94              |                             | -    |
| >203 (N 175/125)                                              | 0.39                       | 0.22-0.69          | 0.001             |                             | 7    |
| <b>HDL cholesterol, mg/dL</b>                                 |                            |                    |                   | 0.11                        |      |
| ≤47 (N 161/127)                                               | 0.54                       | 0.30-0.98          | 0.040             |                             | 14   |
| >47 (N 159/117)                                               | 0.78                       | 0.37-1.64          | 0.51              |                             | 32   |
| <b>Systolic blood pressure, mmHg</b>                          |                            |                    |                   | 0.17                        |      |
| ≤145 (N 162/157)                                              | 0.34                       | 0.17-0.71          | 0.004             |                             | 9    |
| >145 (N 182/105)                                              | 0.81                       | 0.44-1.49          | 0.51              |                             | 71   |
| <b>Diastolic blood pressure, mmHg</b>                         |                            |                    |                   | 0.11                        |      |
| ≤90 (N 196/181)                                               | 0.38                       | 0.19-0.78          | 0.008             |                             | 12   |
| >90 (N 148/81)                                                | 0.65                       | 0.36-1.2           | 0.17              |                             | 15   |
| <b>Glucose-lowering medication, No/Yes</b>                    |                            |                    |                   | 0.15                        |      |
| No (N 180/124)                                                | 0.41                       | 0.20-0.85          | 0.020             |                             | 15   |
| Yes (N 165/138)                                               | 0.78                       | 0.45-1.34          | 0.36              |                             | 20   |
| <b>Diabetes duration, years</b>                               |                            |                    |                   | 0.64                        |      |
| ≤1 (N 199/129)                                                | 0.43                       | 0.21-0.88          | 0.02              |                             | 17   |
| >1 (N 146/133)                                                | 0.82                       | 0.47-1.42          | 0.47              |                             | 22   |

Risk factor-treatment interactions for myocardial infarction (MI) events in subgroups and NNT, number of subjects who need to be operated to prevent one MI event over 15 years.

†For each continuous variable, the test of interaction was calculated using the original continuous variable. Dichotomous variables could have one of two values (e.g., men/women, diabetes yes/no).

\*No significant difference in any of the subgroups with respect to number of individuals needed to operate to prevent one event.

Abbreviations: HR, hazard ratio; CI, confidence interval; NNT number needed to treat; N, numbers; BMI, body-mass index; HDL, high-density lipoprotein.

SUPPLEMENTARY DATA

**Supplementary Figure 1.** Mean 2-year changes in clinical characteristics and metabolic parameters of SOS participants with type 2 diabetes at baseline.

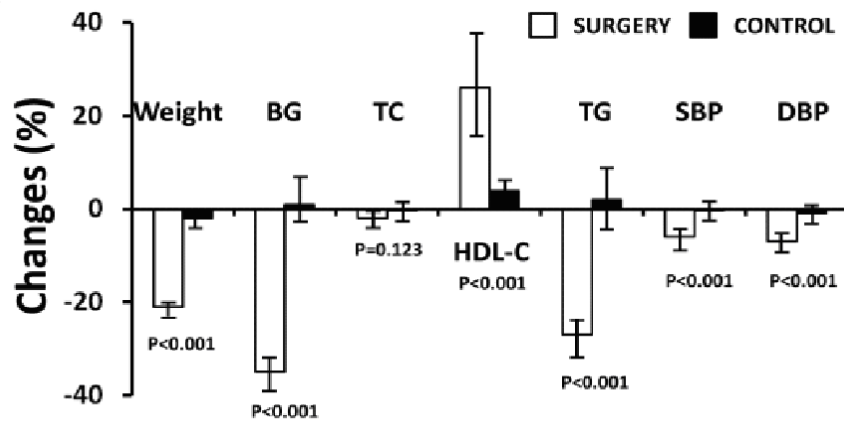

Mean changes are shown as bar graph and 95% confidence interval. P values are calculated with a linear regression model adjusted for age, gender and BMI, except for weight in which BMI was not included as a covariate.

*Abbreviations:* SOS, Swedish obese subjects; BG, blood glucose; TC, total cholesterol; HDL-C, high-density lipoprotein cholesterol; TG, triglycerides; SBP, systolic blood pressure; DBP, diastolic blood pressure.

**Supplementary Figure 2.** Cumulative incidence of myocardial infarction in subjects with diabetes at baseline from the SOS surgery group.

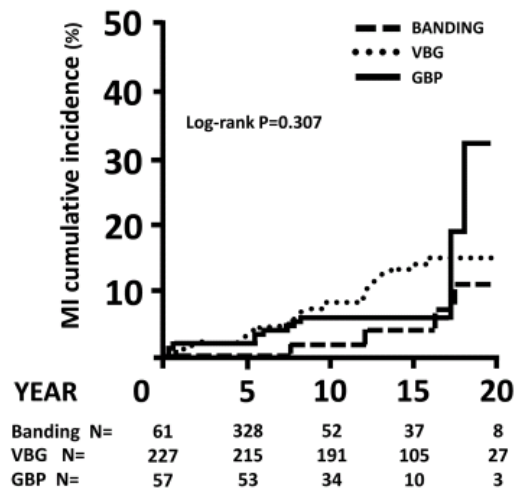

A total of 4/61 subjects in the banding group had myocardial infarction, compared to 29/227 in the vertical gastroplasty group and 5/57 in the gastric bypass group.

*Abbreviations:* SOS, Swedish obese subjects; VBG, vertical gastroplasty; GBP, gastric bypass; N, number.
